# Supplementary material for: Penicillin Treatment Failure in Rabbit Syphilis Due to the Persistence of Treponemes (Treponema paraluisleporidarum Ecovar Cuniculus) in the Focus of Infection
Source: Front Vet Sci. 2021 Jun 17;8:675631. doi: 10.3389/fvets.2021.675631 (PMC8245693; doi:10.3389/fvets.2021.675631)
Supplement: Supplementary file 1 [file Table_1.XLSX]

## Sheet: List1
Table S1. Inoculation doses, numbers of recovered treponemes and results of dark field microscopy during intratesticular propagation of TPeC Cz-2020 in experimental New Zealand White rabbits.
Inoculum	Intratesticular propagation
Total number of inoculated treponemes (source material)	Passage	Testis	Number of treponemesharvested from testes [per ml]	Length of experimental infection [days]
4.25 ×104 (1 ml of extract from the original claw)	1	Right	1.84 ×105	28
		Left	1.77 ×105
1.77 ×105 (1 ml of testicular extract from passage 1)	2	Right	1.80 ×105	20
		Left	3.40 ×105
2.60 ×105 (1 ml of testicular extract from passage 2)	3	Right	3.40 ×105	28
		Left	0

## Sheet: List2
	kmen		polA (TP0105)		TP0488		TP0548		TP0705
