# Supplementary material for: Penicillin Treatment Failure in Rabbit Syphilis Due to the Persistence of Treponemes (Treponema paraluisleporidarum Ecovar Cuniculus) in the Focus of Infection
Source: Front Vet Sci. 2021 Jun 17;8:675631. doi: 10.3389/fvets.2021.675631 (PMC8245693; doi:10.3389/fvets.2021.675631)
Supplement: Supplementary file 2 [file Table_2.XLSX]

## Sheet: List1
Table S2. Nested PCR primers used for molecular typing of the Treponema paraluisleporidarum ecovar Cuniculus strain Cz-2020
Locus (gene)	1st step amplification primers#	Primer sequence 5'-3'	Length of PCR product*	Reference	2nd step amplification primers#	Primer sequence 5'-3'	Length of PCR product*	Reference
TP0105 (polA)	polA_out-F1	TTCTGTGCTCACGTCTGGTC	637 bp	Matějková et al. 2009	polA-F1	TGCGCGTGTGCGAATGGTGTGGTC	376 bp	Liu et al. 2001
	polA_out-R1	TGCAACCATCGTATCGAAAA		Matějková et al. 2009	polA-R1	CACAGTGCTCAAAAACGCCTGCACG		Liu et al. 2001
TP0488 (mcp2)	TP0488_outF	CGGAGCTTTTTCCCGTAA	1878 bp	This study	TP0488_iF	TGGGTGAAGGGTCTTGTGAC	1157 bp	This study
	TP0488_ourR_zajic	TTTCCACACTGAGCGTCTTG		This study	TP0488_iR	GATACCTCGTCCCCTCCAAC		This study
TP0548	TP0548_WF	TGGGGCACTAAACCGGAAGA	1624 bp	Matějková et al. 2009	TP0548_IF	GCGGTCCCTATGATATCGTGT	1074 bp	Woznicová et al. 2007
	TP0548_WR	TACGGGCATTTGCGGATAGG		Matějková et al. 2009	TP0548_IR	GAGCCACTTCAGCCCTACTG		Woznicová et al. 2007
*according to Treponema paraluisleporidarum ecovar Cuniculus strain Cuniculi A genome (CP002103)
#PCR products were obtained by nested PCR and then sequenced using 2nd step primers

## Sheet: List2
	kmen		polA (TP0105)		TP0488		TP0548		TP0705
