# Supplementary material for: Penicillin Treatment Failure in Rabbit Syphilis Due to the Persistence of Treponemes (Treponema paraluisleporidarum Ecovar Cuniculus) in the Focus of Infection
Source: Front Vet Sci. 2021 Jun 17;8:675631. doi: 10.3389/fvets.2021.675631 (PMC8245693; doi:10.3389/fvets.2021.675631)
Supplement: Supplementary file 3 [file Table_3.XLSX]

## Sheet: List1
Table S3. Primers used to amplify and sequence genes coding for penicillin binding proteins in the Treponema paraluisleporidarum ecovar Cuniculus strain Cz-2020
Locus	Protein	Amplification primers$	Primer sequence 5'-3'	Length of PCR product*	Reference	Internal sequencing primers$	Primer sequence 5'-3'	Reference
TP0500	Pbp-1	TP0500_WF	GGGATTGGTGTTGGTATTGC	2197 bp	This study	TP0500_IF1	ATCATTCGCTCACGTTATCG	This study
		TP0500_WR	CGGCCCACACTATTTGTTTT		This study	TP0500_IF2	CTGGACAGTCTGTCGAGACT	This study
					This study	TP0500_IR1	TTTTCAATTCCAGCCTTTCC	This study
					This study	TP0500_IR2	GTTGGAACCATACCCTCTGT	This study
TP0547	LytB	TP0547_WF	TTCGTCGAAGACACGACAAC	1358 bp	This study	TP0547_IF	GTACGCGCTACCGTCAATTC	This study
		TP0547_WR	GCAGGAAAAGCAACGTGTC		This study	TP0547_IR	CCGCGAGTTAAGGAAAGTCA	This study
TP0574	Carboxypeptidase 47 kDa	TP0574_WF	GCAACCAAGGAAAACAATGC	1597 bp	This study	TP0574_IF	ACCAAAACGGCTGTGGTAAC	This study
		TP0574_WR	CAATAATGCCGGTGATAGGG		This study	TP0574_IR	AGTTGCGGTTCCTCATGAAT	This study
TP0705	Pbp-2	TP0705_gene_F	GCCCTTCCTCCGAGAGAGTA	2888 bp	This study	TP0705WF	GGTCTATATGCAGCCCTTCTTC	Grillová et al. 2018
		TP0705_gene_R	GTGTGTCTGCCTGAGTGCAT		This study	TP0705WR	GCTTGAGAACGATACCGGATAC	Grillová et al. 2018
						TP0705_F	TGCGGCTTATCCTGATGAATAG	Grillová et al. 2018
						TP0705_R	TATTCTGCGGCGTTGGATAG	Grillová et al. 2018
						LG_705IF1	GTTGCAGGGTCTTGGTATGT	This study
						LG_705IF2	GGACTCATCCCGTTCTTGTT	This study
						LG_705IF3	CTTGGTTAGAAGCACCGAATCT	This study
						LG_705WR3	AGCAGATAGCAGGTCTTCTCTA	This study
						LG_705IR4	CAGTGTTGTGGTTTGGCTTTG	This study
TP0760	Pbp-3	TP0760WF	CGTTTCTTCCGAAAGCACTC	2263 bp	This study	TP0760IF1	TCCACGGTCATCGGATACGT	This study
		TP0760WR	TGCTCGTTTGGAAGTGTCAG		This study	TP0760IF2	CCGTCGGTCTCTTCTCTCCC	This study
						TP0760IR1	GCCGGAGCGTAGTATCTGCG	This study
						TP0760IR2	TACCTTCGGCGGTAGTGACC	This study
*according to Treponema paraluisleporidarum ecovar Cuniculus strain Cuniculi A genome (CP002103)
$PCR products were amplified using amplification primers and Sanger sequenced using amplification and internal sequencing primers
